# Supplementary material for: Effect of X-ray irradiation on hepatocarcinoma cells and erythrocytes in salvaged blood
Source: PubMed Central journal article supplement (PMC5554194; doi:10.1038/s41598-017-08405-z), 2017-08-11
Supplement: 41598_2017_8405_MOESM1_ESM.pdf [file 41598_2017_8405_MOESM1_ESM.pdf]

## Supporting Information for

# **Effect of X-ray irradiation on hepatocarcinoma cells and erythrocytes in salvaged blood**

### **Author list and affiliations**

**Feng-Jiang Zhang<sup>1,+</sup>, Jin-Ting Yang<sup>1,+</sup>, Li-Hui Tang<sup>1</sup>, Wen-Na Wang<sup>1</sup>, Kai Sun<sup>1</sup>, Yue Ming<sup>1</sup>, Kanhar Ghulam Muhammad<sup>2</sup>, Yin-Fei Zheng<sup>2</sup> & Min Yan<sup>1,\*</sup>**

<sup>1</sup>Department of Anesthesiology, the Second Affiliated Hospital, Zhejiang University School of Medicine, Hangzhou 310009, P. R. China.

<sup>2</sup>Biomedical Engineering of Zhejiang University, Hangzhou 310027, P. R. China.

\*Correspondence and requests for materials should be addressed to M.Y. (email: [zryanmin@zju.edu.cn](mailto:zryanmin@zju.edu.cn)).

<sup>+</sup>These authors contributed equally to this work.

## Supplementary Figures 1 – 2

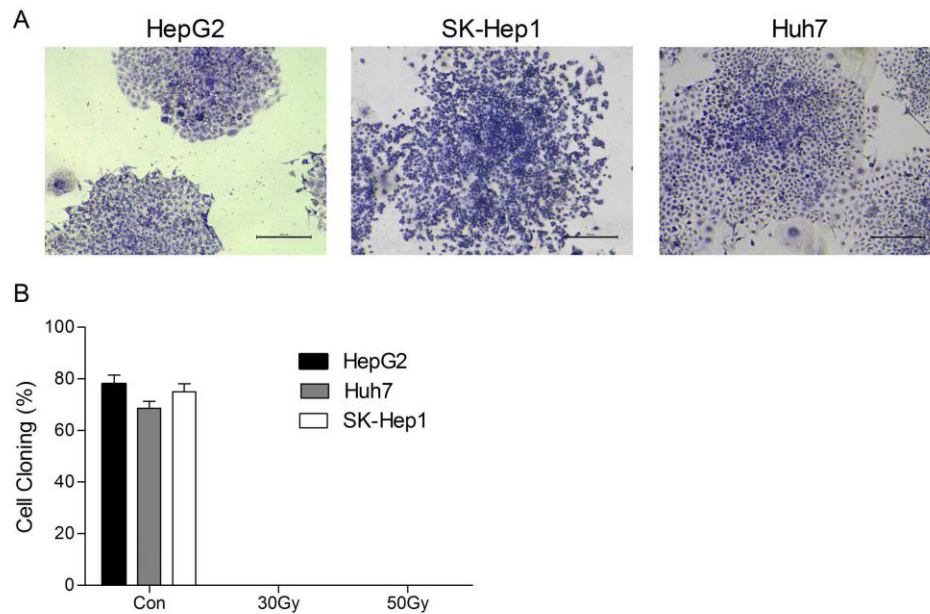

**Supplementary Figure 1. X-ray irradiation inhibits the colony formation in tumor cell lines *in vitro*.** After X-ray irradiation, HepG2, Huh7, and SK-Hep1 cells separated were cultured for 14 d. Representative Giemsa staining (scale bar = 100  $\mu$ m) in 0 Gy X-ray irradiated HepG2, Huh7, and SK-Hep1 cells after culturing for 7 d (A). Colony formation rates in X-ray irradiated tumor cells after culturing for 7 d were detected (B). Data are means  $\pm$  SEM; n = 6.

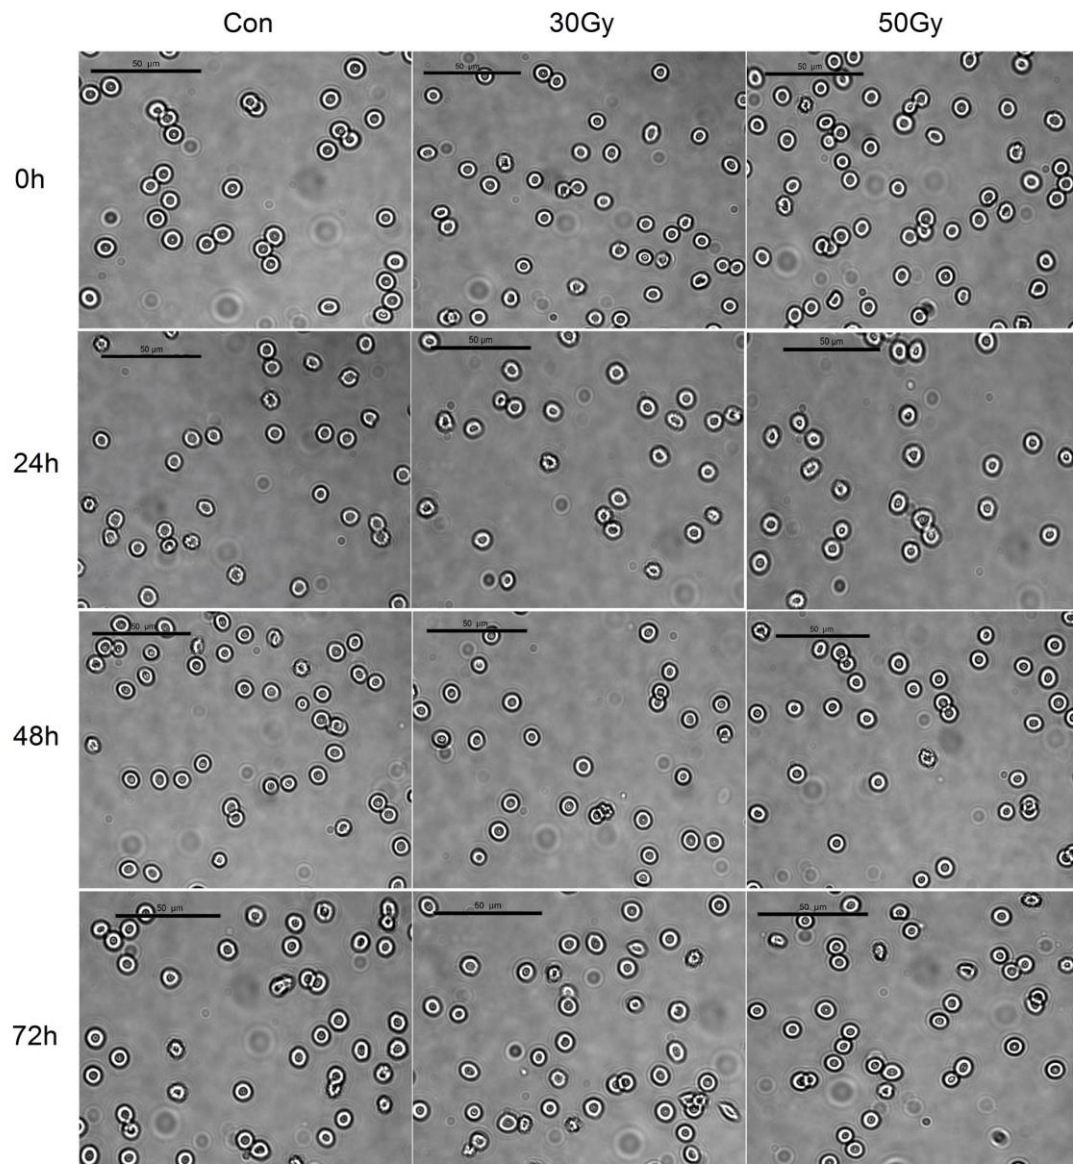

**Supplementary Figure 2. Effects of X-ray irradiation on the morphology of erythrocytes *in vitro*.** After X-ray irradiation, erythrocytes were cultured for 0, 24, 48 and 72 hours. Representative morphology of erythrocytes (scale bar = 50 μm) were detected under an inverted microscopy.
